# Supplementary material for: Chronic consumption of a western diet modifies the DNA methylation profile in the frontal cortex of mice
Source: Royal Society of Chemistry journal article supplement (doi:10.1039/c7fo01602f), 2018-01-01
Supplement: c7fo01602f1.pdf [file c7fo01602f1.pdf]

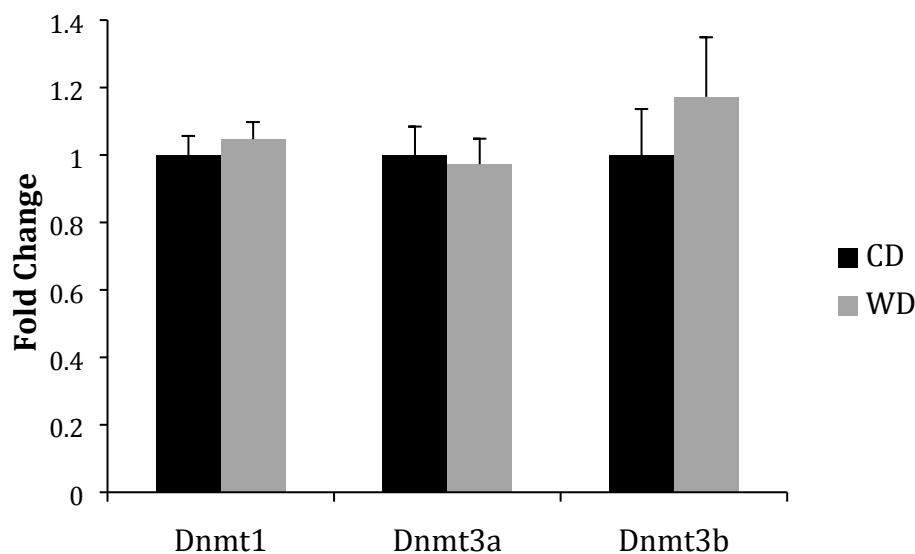

**Supplemental Figure 1: Gene expression of Dnmt enzymes as determined by qPCR.**

Consumption of a WD did not significantly impact the gene expression of *Dnmt1*, *Dnmt3a* or *Dnmt3b* ( $p = 0.587$ ,  $p = 0.780$  and  $p = 0.449$ , respectively). Expression of each gene was normalized to that of *Gapdh*, and fold change was calculated as the ratio of WD to CD.  $n = 6$  per treatment group, and results are expressed as mean  $\pm$  SEM.  $p < 0.05$  was considered significant.

### Supplemental table 1 : Composiiton of the diets

Wetern type diet

| <b>Formula</b>                      | <b>g/Kg</b> |
|-------------------------------------|-------------|
| <b>Casein</b>                       | 195         |
| <b>DL-Methionine</b>                | 3           |
| <b>Sucrose</b>                      | 341.46      |
| <b>Corn Starch</b>                  | 150         |
| <b>Andydrous Milkfat</b>            | 210         |
| <b>Cholesterol</b>                  | 1.5         |
| <b>Cellulose</b>                    | 50          |
| <b>Mineral Mix, AIN-76 (170915)</b> | 35          |
| <b>Calcium Carbonate</b>            | 4           |
| <b>Vitamin Mix, Teklad (40060)</b>  | 10          |
| <b>Ethoxyquin</b>                   | 0.04        |

Control Diet

| <b>Formula</b>           | <b>g/Kg</b> |
|--------------------------|-------------|
| <b>Casein</b>            | 195         |
| <b>DL-Methionine</b>     | 3           |
| <b>Sucrose</b>           | 120         |
| <b>Corn Starch</b>       | 432.99      |
| <b>Maltodextrin</b>      | 100         |
| <b>Andydrous Milkfat</b> | 37.2        |

|                                     |      |
|-------------------------------------|------|
| <b>Soybean Oil</b>                  | 12.8 |
| <b>Cellulose</b>                    | 50   |
| <b>Mineral Mix, AIN-76 (170915)</b> | 35   |
| <b>Calcium Carbonate</b>            | 4    |
| <b>Vitamin Mix, Teklad (40060)</b>  | 10   |
| <b>Ethoxyquin</b>                   | 0.04 |

**Supplemental Table 2: Nucleotide sequences of primers used to quantify gene expression of various genes using qRT-PCR.**

| <b>Gene</b>   | <b>Forward Primer (5' to 3')</b> | <b>Reverse Primer (5' to 3')</b> |
|---------------|----------------------------------|----------------------------------|
| <i>Dnmt1</i>  | CCAGCTGCCAAACGGAGA               | CCTCGGGAGTCTCTGGAGCTA            |
| <i>Dnmt3a</i> | CACTGGAGTAGGCGCTGAGAC            | CAGCAAAGGGCCTTCCATAG             |
| <i>Dnmt3b</i> | CCGTTCGACTTGGTGATTGG             | GGGCAGGATTGACGTTAGAGAG           |
| <i>Gapdh</i>  | GGATAGGGCCTCTCTTGCTCA            | GCAACAGGGTGGTGGACCT              |
